# Supplementary material
Source: publisher site journal article supplement (https://www.dovepress.com/article/604257)
Supplement: Supplementary file 1 [file Supplementary%20table.pdf]

**Supplementary Table**

**Table S1. Frequency distribution of follow-up visits to PrEP services by number of days from PrEP initiation and scheduled appointment among female sex workers in the city of Tanga, Tanzania**

|                  | Days from Initiation to follow-up visits | Days from a scheduled appointment to follow-up visit (delay) |
|------------------|------------------------------------------|--------------------------------------------------------------|
| Follow-up visits | Median (IQR: 25%-75%)                    | Median (IQR: 25%-75%)                                        |
| Overall          | 133.5 (58-211)                           | 71 (7-144)                                                   |
| Visit 1          | 88 (35-182)                              | 58 (7-147)                                                   |
| Visit 2          | 205 (120-216)                            | 98 (11-144)                                                  |
| Visit 3          | 211 (203.5-219.5)                        | 47.5 (5-123)                                                 |
| Visit 4          | 216 (181-301)                            | 19 (2-153)                                                   |
